# Supplementary material
Source: Springer Nature journal article supplement (https://www.springermedizin.de/resource/supplementary/12904_2013_244_MOESM4_ESM.pdf/9517750)
Supplement: MOESM4 [file 9517750]

# RASS-PAL

## Strengths of tool

- Ease/Utility of Tool
- Common language/ Standardization
- Assists interprofessional communication

## Limitations of tool

- Challenge in differentiating agitation from delirium
- Challenge in capturing mixed delirium
- Burden on health care professionals regarding the accumulation of clinical tools required in daily practice

## Potential to improve patient care?

- Assessing/informing and following through to decision-making
- Need for further education/communication when integrating tools into clinical practice
